# Supplementary material
Source: publisher figshare collection journal article supplement (https://acs.figshare.com/ndownloader/files/4776883)
Supplement: Supplementary file 1 [file 4776883]

data_md40twin 
 
_audit_creation_method            SHELXL-97 
_chemical_name_systematic 
; 
 ? 
; 
_chemical_name_common             ? 
_chemical_melting_point           ? 
_chemical_formula_moiety          'C20.4 H6 Cl3 Mn3 N14.4 O13.32' 
_chemical_formula_sum 		  'C20.4 H6 Cl3 Mn3 N14.4 O13.32' 
_chemical_formula_weight          936.76
 
loop_ 
 _atom_type_symbol 
 _atom_type_description 
 _atom_type_scat_dispersion_real 
 _atom_type_scat_dispersion_imag 
 _atom_type_scat_source 
 'C'  'C'   0.0033   0.0016 
 'International Tables Vol C Tables 4.2.6.8 and 6.1.1.4' 
 'H'  'H'   0.0000   0.0000 
 'International Tables Vol C Tables 4.2.6.8 and 6.1.1.4' 
 'N'  'N'   0.0061   0.0033 
 'International Tables Vol C Tables 4.2.6.8 and 6.1.1.4' 
 'O'  'O'   0.0106   0.0060 
 'International Tables Vol C Tables 4.2.6.8 and 6.1.1.4' 
 'Mn'  'Mn'   0.3368   0.7283 
 'International Tables Vol C Tables 4.2.6.8 and 6.1.1.4' 
 'Cl'  'Cl'   0.1484   0.1585 
 'International Tables Vol C Tables 4.2.6.8 and 6.1.1.4' 
 
_symmetry_cell_setting            trigonal 
_symmetry_space_group_name_H-M    'R -3'
_symmetry_space_group_name_Hall	  '-R 3' 
 
loop_ 
 _symmetry_equiv_pos_as_xyz 
 'x, y, z' 
 '-y, x-y, z' 
 '-x+y, -x, z' 
 'x+2/3, y+1/3, z+1/3' 
 '-y+2/3, x-y+1/3, z+1/3' 
 '-x+y+2/3, -x+1/3, z+1/3' 
 'x+1/3, y+2/3, z+2/3' 
 '-y+1/3, x-y+2/3, z+2/3' 
 '-x+y+1/3, -x+2/3, z+2/3' 
 '-x, -y, -z' 
 'y, -x+y, -z' 
 'x-y, x, -z' 
 '-x+2/3, -y+1/3, -z+1/3' 
 'y+2/3, -x+y+1/3, -z+1/3' 
 'x-y+2/3, x+1/3, -z+1/3' 
 '-x+1/3, -y+2/3, -z+2/3' 
 'y+1/3, -x+y+2/3, -z+2/3' 
 'x-y+1/3, x+2/3, -z+2/3' 
 
_cell_length_a                    33.018(7) 
_cell_length_b                    33.018(7) 
_cell_length_c                    8.603(1) 
_cell_angle_alpha                 90.00 
_cell_angle_beta                  90.00 
_cell_angle_gamma                 120.00 
_cell_volume                      8123(3) 
_cell_formula_units_Z             6 
_cell_measurement_temperature     176(2) 
_cell_measurement_reflns_used     1928 
_cell_measurement_theta_min       4.932 
_cell_measurement_theta_max       41.415 
 
_exptl_crystal_description        needle
_exptl_crystal_colour             colorless 
_exptl_crystal_size_max           0.27 
_exptl_crystal_size_mid           0.07 
_exptl_crystal_size_min           0.07 
_exptl_crystal_density_meas       ? 
_exptl_crystal_density_diffrn     1.149 
_exptl_crystal_density_method     'not measured' 
_exptl_crystal_F_000              2770 
_exptl_absorpt_coefficient_mu     0.890 
_exptl_absorpt_correction_type    empirical 
_exptl_absorpt_correction_T_min   0.707053 
_exptl_absorpt_correction_T_max   1.0 
_exptl_absorpt_process_details    'Blessing, 1995' 
 
_exptl_special_details 
; 
 ? 
; 
 
_diffrn_ambient_temperature       176(2) 
_diffrn_radiation_wavelength      0.71073 
_diffrn_radiation_type            MoK\a 
_diffrn_radiation_source          'fine-focus sealed tube' 
_diffrn_radiation_monochromator   graphite 
_diffrn_measurement_device_type   'Bruker SMART CCD' 
_diffrn_measurement_method        '\w/2\q-scans'
_diffrn_detector_area_resol_mean  ? 
_diffrn_standards_number          0 
_diffrn_standards_interval_count  0 
_diffrn_standards_interval_time   0 
_diffrn_standards_decay_%         0 
_diffrn_reflns_number             15399 
_diffrn_reflns_av_R_equivalents   0.0998 
_diffrn_reflns_av_sigmaI/netI     0.2727 
_diffrn_reflns_limit_h_min        -35 
_diffrn_reflns_limit_h_max        41 
_diffrn_reflns_limit_k_min        -37 
_diffrn_reflns_limit_k_max        41 
_diffrn_reflns_limit_l_min        -10 
_diffrn_reflns_limit_l_max        10 
_diffrn_reflns_theta_min          1.23 
_diffrn_reflns_theta_max          26.41 
_reflns_number_total              3692 
_reflns_number_gt                 1578 
_reflns_threshold_expression      >2sigma(I) 
 
_computing_data_collection        'Bruker SMART v5.054d' 
_computing_cell_refinement        'Bruker SAINT v7.07b' 
_computing_data_reduction         'Bruker SAINT v7.07b'
_computing_structure_solution     'SHELXS-97 (Sheldrick, 1990)' 
_computing_structure_refinement   'SHELXL-97 (Sheldrick, 1997)' 
_computing_molecular_graphics     ? 
_computing_publication_material   ? 
 
_refine_special_details 
; 
 Refinement of F^2^ against ALL reflections.  The weighted R-factor wR and 
 goodness of fit S are based on F^2^, conventional R-factors R are based 
 on F, with F set to zero for negative F^2^. The threshold expression of 
 F^2^ > 2sigma(F^2^) is used only for calculating R-factors(gt) etc. and is 
 not relevant to the choice of reflections for refinement.  R-factors based 
 on F^2^ are statistically about twice as large as those based on F, and R- 
 factors based on ALL data will be even larger. 
; 
 
_refine_ls_structure_factor_coef  Fsqd  
_refine_ls_matrix_type            full 
_refine_ls_weighting_scheme       calc  
_refine_ls_weighting_details 
 'calc w=1/[\s^2^(Fo^2^)+(0.0727P)^2^+0.0000P] where P=(Fo^2^+2Fc^2^)/3' 
_atom_sites_solution_primary      direct 
_atom_sites_solution_secondary    difmap 
_atom_sites_solution_hydrogens    geom 
_refine_ls_hydrogen_treatment     constr
_refine_ls_extinction_method      none 
_refine_ls_extinction_coef        ? 
_refine_ls_number_reflns          3692 
_refine_ls_number_parameters      162 
_refine_ls_number_restraints      0 
_refine_ls_R_factor_all           0.1107 
_refine_ls_R_factor_gt            0.0582 
_refine_ls_wR_factor_ref          0.1540 
_refine_ls_wR_factor_gt           0.1467 
_refine_ls_goodness_of_fit_ref    0.745 
_refine_ls_restrained_S_all       0.745 
_refine_ls_shift/su_max           0.013 
_refine_ls_shift/su_mean          0.001 
 
loop_ 
 _atom_site_label 
 _atom_site_type_symbol 
 _atom_site_fract_x 
 _atom_site_fract_y 
 _atom_site_fract_z 
 _atom_site_U_iso_or_equiv 
 _atom_site_adp_type 
 _atom_site_occupancy 
 _atom_site_symmetry_multiplicity 
 _atom_site_calc_flag 
 _atom_site_refinement_flags 
 _atom_site_disorder_assembly 
 _atom_site_disorder_group 
Mn1 Mn 0.37921(4) 0.03799(4) 0.12012(13) 0.0282(3) Uani 1 1 d . . . 
Cl1 Cl 0.39876(7) -0.01138(7) 0.2902(2) 0.0372(5) Uani 1 1 d . . . 
O1 O 0.4458(2) 0.1012(2) 0.1191(7) 0.0508(17) Uani 1 1 d . . . 
O2 O 0.5137(9) 0.0714(11) -0.436(3) 0.166(9) Uiso 0.50 1 d P . . 
O3 O 0.4597(8) 0.0888(9) -0.418(3) 0.162(8) Uiso 0.50 1 d P . . 
O4 O 0.5109(8) 0.0326(9) -0.471(3) 0.176(10) Uiso 0.50 1 d P . . 
O5 O 0.5007(11) 0.1012(10) -0.461(3) 0.151(10) Uiso 0.40 1 d P . . 
O6 O 0.4645(10) 0.1304(12) -0.364(4) 0.171(11) Uiso 0.40 1 d P . . 
O7 O 0.4542(10) 0.2371(10) -0.065(3) 0.204(11) Uiso 0.50 1 d P . . 
O8 O 0.6619(13) 0.2717(13) 0.171(4) 0.154(13) Uiso 0.30 1 d P . . 
O9 O 0.498(2) 0.173(2) -0.493(8) 0.22(2) Uiso 0.25 1 d P . . 
O10 O 0.6667 0.3333 0.3333 0.085(12) Uiso 0.50 6 d SP . . 
N1 N 0.3926(2) 0.0090(2) -0.1034(7) 0.0306(16) Uani 1 1 d . . . 
N2 N 0.3592(2) -0.0033(2) -0.2139(7) 0.0285(15) Uani 1 1 d . . . 
N3 N 0.3673(2) -0.0262(2) -0.3212(6) 0.0287(15) Uani 1 1 d . . . 
N4 N 0.4035(2) -0.0309(2) -0.2881(7) 0.0339(16) Uani 1 1 d . . . 
N5 N 0.4950(7) 0.1754(7) 0.156(2) 0.119(7) Uiso 0.60 1 d P . . 
N5A N 0.4947(12) 0.1710(11) -0.017(4) 0.037(9) Uiso 0.20 1 d P . . 
C1 C 0.4188(2) -0.0089(3) -0.1522(8) 0.0222(17) Uani 1 1 d . . . 
C2 C 0.4587(3) -0.0048(3) -0.0743(8) 0.030(2) Uani 1 1 d . . . 
C3 C 0.4892(3) 0.0356(3) 0.0201(8) 0.039(2) Uani 1 1 d . . . 
H3 H 0.4821 0.0592 0.0344 0.047 Uiso 1 1 calc R . . 
C4 C 0.4716(3) -0.0390(3) -0.0885(8) 0.038(2) Uani 1 1 d . . . 
H4 H 0.4526 -0.0655 -0.1472 0.045 Uiso 1 1 calc R . . 
C5 C 0.4515(6) 0.1382(6) 0.165(2) 0.079(5) Uiso 0.70 1 d P . . 
C5A C 0.4571(13) 0.1418(14) 0.011(5) 0.078(12) Uiso 0.30 1 d P . . 
C6 C 0.5356(6) 0.1708(6) 0.101(2) 0.158(6) Uiso 1 1 d . . . 
C8 C 0.4999(15) 0.2244(15) 0.204(5) 0.167(17) Uiso 0.40 1 d P . . 
C8A C 0.498(2) 0.194(2) -0.244(8) 0.28(3) Uiso 0.40 1 d P . . 
 
loop_ 
 _atom_site_aniso_label 
 _atom_site_aniso_U_11 
 _atom_site_aniso_U_22 
 _atom_site_aniso_U_33 
 _atom_site_aniso_U_23 
 _atom_site_aniso_U_13 
 _atom_site_aniso_U_12 
Mn1 0.0384(8) 0.0361(8) 0.0096(5) -0.0022(6) 0.0021(6) 0.0181(7) 
Cl1 0.0428(13) 0.0566(15) 0.0183(10) 0.0031(10) 0.0027(9) 0.0293(12) 
O1 0.054(4) 0.061(4) 0.041(4) 0.002(3) 0.011(3) 0.032(3) 
N1 0.024(4) 0.034(4) 0.024(4) 0.002(3) -0.006(3) 0.007(3) 
N2 0.035(4) 0.040(4) 0.007(3) -0.003(3) -0.003(3) 0.016(3) 
N3 0.035(4) 0.053(4) 0.010(3) -0.005(3) -0.007(3) 0.031(4) 
N4 0.043(4) 0.058(5) 0.013(3) -0.007(3) -0.009(3) 0.035(4) 
C1 0.018(4) 0.035(5) 0.013(4) 0.000(3) 0.002(3) 0.014(4) 
C2 0.040(5) 0.041(5) 0.018(4) 0.002(4) 0.010(4) 0.027(5) 
C3 0.049(6) 0.050(6) 0.025(5) -0.003(4) 0.006(4) 0.030(5) 
C4 0.031(5) 0.054(6) 0.014(4) -0.009(4) -0.011(4) 0.010(5) 
 
_geom_special_details 
; 
 All esds (except the esd in the dihedral angle between two l.s. planes) 
 are estimated using the full covariance matrix.  The cell esds are taken 
 into account individually in the estimation of esds in distances, angles 
 and torsion angles; correlations between esds in cell parameters are only 
 used when they are defined by crystal symmetry.  An approximate (isotropic) 
 treatment of cell esds is used for estimating esds involving l.s. planes. 
; 
 
loop_ 
 _geom_bond_atom_site_label_1 
 _geom_bond_atom_site_label_2 
 _geom_bond_distance 
 _geom_bond_site_symmetry_2 
 _geom_bond_publ_flag 
Mn1 O1 2.144(6) . ? 
Mn1 N3 2.279(6) 8_545 ? 
Mn1 N1 2.289(7) . ? 
Mn1 N2 2.317(6) 6 ? 
Mn1 Cl1 2.503(2) . ? 
Mn1 Cl1 2.525(2) 8_544 ? 
Cl1 Mn1 2.525(2) 6 ? 
O1 C5 1.204(17) . ? 
O1 C5A 1.52(4) . ? 
O2 O5 1.27(3) . ? 
O2 O4 1.27(3) . ? 
O3 O5 1.26(3) . ? 
O3 O6 1.38(3) . ? 
O6 O9 1.70(6) . ? 
N1 C1 1.333(9) . ? 
N1 N2 1.355(8) . ? 
N2 N3 1.303(8) . ? 
N2 Mn1 2.316(6) 8_544 ? 
N3 N4 1.311(7) . ? 
N3 Mn1 2.280(6) 6_554 ? 
N4 C1 1.335(9) . ? 
N5 C5 1.35(2) . ? 
N5 N5A 1.49(4) . ? 
N5 C6 1.50(2) . ? 
N5 C8 1.60(4) . ? 
N5 C5A 1.72(4) . ? 
N5A C5A 1.15(4) . ? 
N5A C6 1.69(3) . ? 
C1 C2 1.425(10) . ? 
C2 C4 1.397(10) . ? 
C2 C3 1.453(10) . ? 
C3 C4 1.374(11) 10_655 ? 
C4 C3 1.374(11) 10_655 ? 
C5 C5A 1.34(4) . ? 
 
loop_ 
 _geom_angle_atom_site_label_1 
 _geom_angle_atom_site_label_2 
 _geom_angle_atom_site_label_3 
 _geom_angle 
 _geom_angle_site_symmetry_1 
 _geom_angle_site_symmetry_3 
 _geom_angle_publ_flag 
O1 Mn1 N3 90.5(2) . 8_545 ? 
O1 Mn1 N1 94.9(2) . . ? 
N3 Mn1 N1 174.5(2) 8_545 . ? 
O1 Mn1 N2 174.6(2) . 6 ? 
N3 Mn1 N2 87.0(2) 8_545 6 ? 
N1 Mn1 N2 87.7(2) . 6 ? 
O1 Mn1 Cl1 99.44(17) . . ? 
N3 Mn1 Cl1 85.42(16) 8_545 . ? 
N1 Mn1 Cl1 92.95(17) . . ? 
N2 Mn1 Cl1 85.14(17) 6 . ? 
O1 Mn1 Cl1 90.36(17) . 8_544 ? 
N3 Mn1 Cl1 92.09(16) 8_545 8_544 ? 
N1 Mn1 Cl1 88.62(17) . 8_544 ? 
N2 Mn1 Cl1 84.95(17) 6 8_544 ? 
Cl1 Mn1 Cl1 169.90(8) . 8_544 ? 
Mn1 Cl1 Mn1 96.76(8) . 6 ? 
C5 O1 C5A 57.3(15) . . ? 
C5 O1 Mn1 123.5(9) . . ? 
C5A O1 Mn1 122.9(14) . . ? 
O5 O2 O4 149(3) . . ? 
O5 O3 O6 102(3) . . ? 
O3 O5 O2 115(3) . . ? 
O3 O6 O9 108(3) . . ? 
C1 N1 N2 104.9(6) . . ? 
C1 N1 Mn1 138.9(5) . . ? 
N2 N1 Mn1 114.5(5) . . ? 
N3 N2 N1 107.3(6) . . ? 
N3 N2 Mn1 124.2(4) . 8_544 ? 
N1 N2 Mn1 128.4(5) . 8_544 ? 
N2 N3 N4 112.3(6) . . ? 
N2 N3 Mn1 119.8(4) . 6_554 ? 
N4 N3 Mn1 127.6(5) . 6_554 ? 
N3 N4 C1 104.1(6) . . ? 
C5 N5 N5A 90.8(19) . . ? 
C5 N5 C6 121.6(17) . . ? 
N5A N5 C6 68.9(16) . . ? 
C5 N5 C8 115(2) . . ? 
N5A N5 C8 111(2) . . ? 
C6 N5 C8 123(2) . . ? 
C5 N5 C5A 49.7(16) . . ? 
N5A N5 C5A 41.2(16) . . ? 
C6 N5 C5A 96.0(18) . . ? 
C8 N5 C5A 121(2) . . ? 
C5A N5A N5 80(3) . . ? 
C5A N5A C6 114(3) . . ? 
N5 N5A C6 55.8(14) . . ? 
N1 C1 N4 111.4(6) . . ? 
N1 C1 C2 125.7(7) . . ? 
N4 C1 C2 122.9(7) . . ? 
C4 C2 C1 121.7(7) . . ? 
C4 C2 C3 116.1(7) . . ? 
C1 C2 C3 122.2(7) . . ? 
C4 C3 C2 120.5(8) 10_655 . ? 
C3 C4 C2 123.4(7) 10_655 . ? 
O1 C5 C5A 73.3(19) . . ? 
O1 C5 N5 117.6(17) . . ? 
C5A C5 N5 80(2) . . ? 
N5A C5A C5 109(3) . . ? 
N5A C5A O1 124(3) . . ? 
C5 C5A O1 49.4(16) . . ? 
N5A C5A N5 59(2) . . ? 
C5 C5A N5 50.3(15) . . ? 
O1 C5A N5 84(2) . . ? 
N5 C6 N5A 55.3(14) . . ? 
 
_diffrn_measured_fraction_theta_max    0.994 
_diffrn_reflns_theta_full              26.41 
_diffrn_measured_fraction_theta_full   0.994 
_refine_diff_density_max    0.583 
_refine_diff_density_min   -0.632 
_refine_diff_density_rms    0.137 
